# Supplementary material
Source: publisher figshare collection journal article supplement (https://sage.figshare.com/ndownloader/files/15007955)
Supplement: Supplementary file 1 [file 15007955]

## Appendix

Supplementary Table 1. English version of the Family Stigma Stress Scale (FSSS)

### Family Stigma Stress Scale

*Instructions: Please read through the following statements and rate each statement from 1 (strongly disagree) to 7 (strongly agree).*

|   |                                                                                                            | Strongly<br>Disagree | Disagree | Agree | Strongly<br>Agree |
|---|------------------------------------------------------------------------------------------------------------|----------------------|----------|-------|-------------------|
| 1 | Prejudice against my relative with mental illness has a negative impact on my future.                      | 1                    | 2        | 3     | 4                 |
| 2 | Prejudice against my relative with mental illness has harmful or bad consequences for me.                  | 1                    | 2        | 3     | 4                 |
| 3 | Prejudice against my relative with mental illness affects many areas of my life.                           | 1                    | 2        | 3     | 4                 |
| 4 | Prejudice against my relative with mental illness has a severe impact on my life.                          | 1                    | 2        | 3     | 4                 |
| 5 | I am prepared to deal with prejudice against my relative with mental illness.                              | 1                    | 2        | 3     | 4                 |
| 6 | I have the resources I need to handle problems posed by prejudice against my relative with mental illness. | 1                    | 2        | 3     | 4                 |
| 7 | I will do the best I can to deal with prejudice against my relative with mental illness.                   | 1                    | 2        | 3     | 4                 |
| 8 | I am able to rise up and meet the demands posed by prejudice against my relative with mental illness.      | 1                    | 2        | 3     | 4                 |

Supplementary Table 2. Test-retest reliability of the Family Stigma Stress Scale (FSSS) in different timeframes

| <b>Factor<br/>Item#</b>           | <b>Two to<br/>four weeks<br/>(n = 112)</b> | <b>Four to<br/>eight weeks<br/>(n = 47)</b> | <b>Eight to<br/>twelve weeks<br/>(n = 37)</b> |
|-----------------------------------|--------------------------------------------|---------------------------------------------|-----------------------------------------------|
| <b>Perceived harm</b>             | <b>.569</b>                                | <b>.749</b>                                 | <b>.547</b>                                   |
| F1                                | .453                                       | .590                                        | .396                                          |
| F2                                | .387                                       | .651                                        | .399                                          |
| F3                                | .532                                       | .584                                        | .410                                          |
| F4                                | .405                                       | .739                                        | .400                                          |
| <b>Perceived coping resources</b> | <b>.526</b>                                | <b>.567</b>                                 | <b>.540</b>                                   |
| F5                                | .408                                       | .377                                        | .571                                          |
| F6                                | .442                                       | .418                                        | .532                                          |
| F7                                | .405                                       | .096                                        | .282                                          |
| F8                                | .404                                       | .642                                        | .280                                          |

*Note:* Different participants were re-tested at different intervals after the baseline assessment (total N=196).
